# Supplementary material for: Glycogen Storage Disease Phenotypes Accompanying the Perturbation of the Methionine Cycle in NDRG3-Deficient Mouse Livers
Source: MDPI journal article supplement (doi:10.3390/cells11091536), 2022-05-04
Supplement: s1 [file s1]

Figure S1

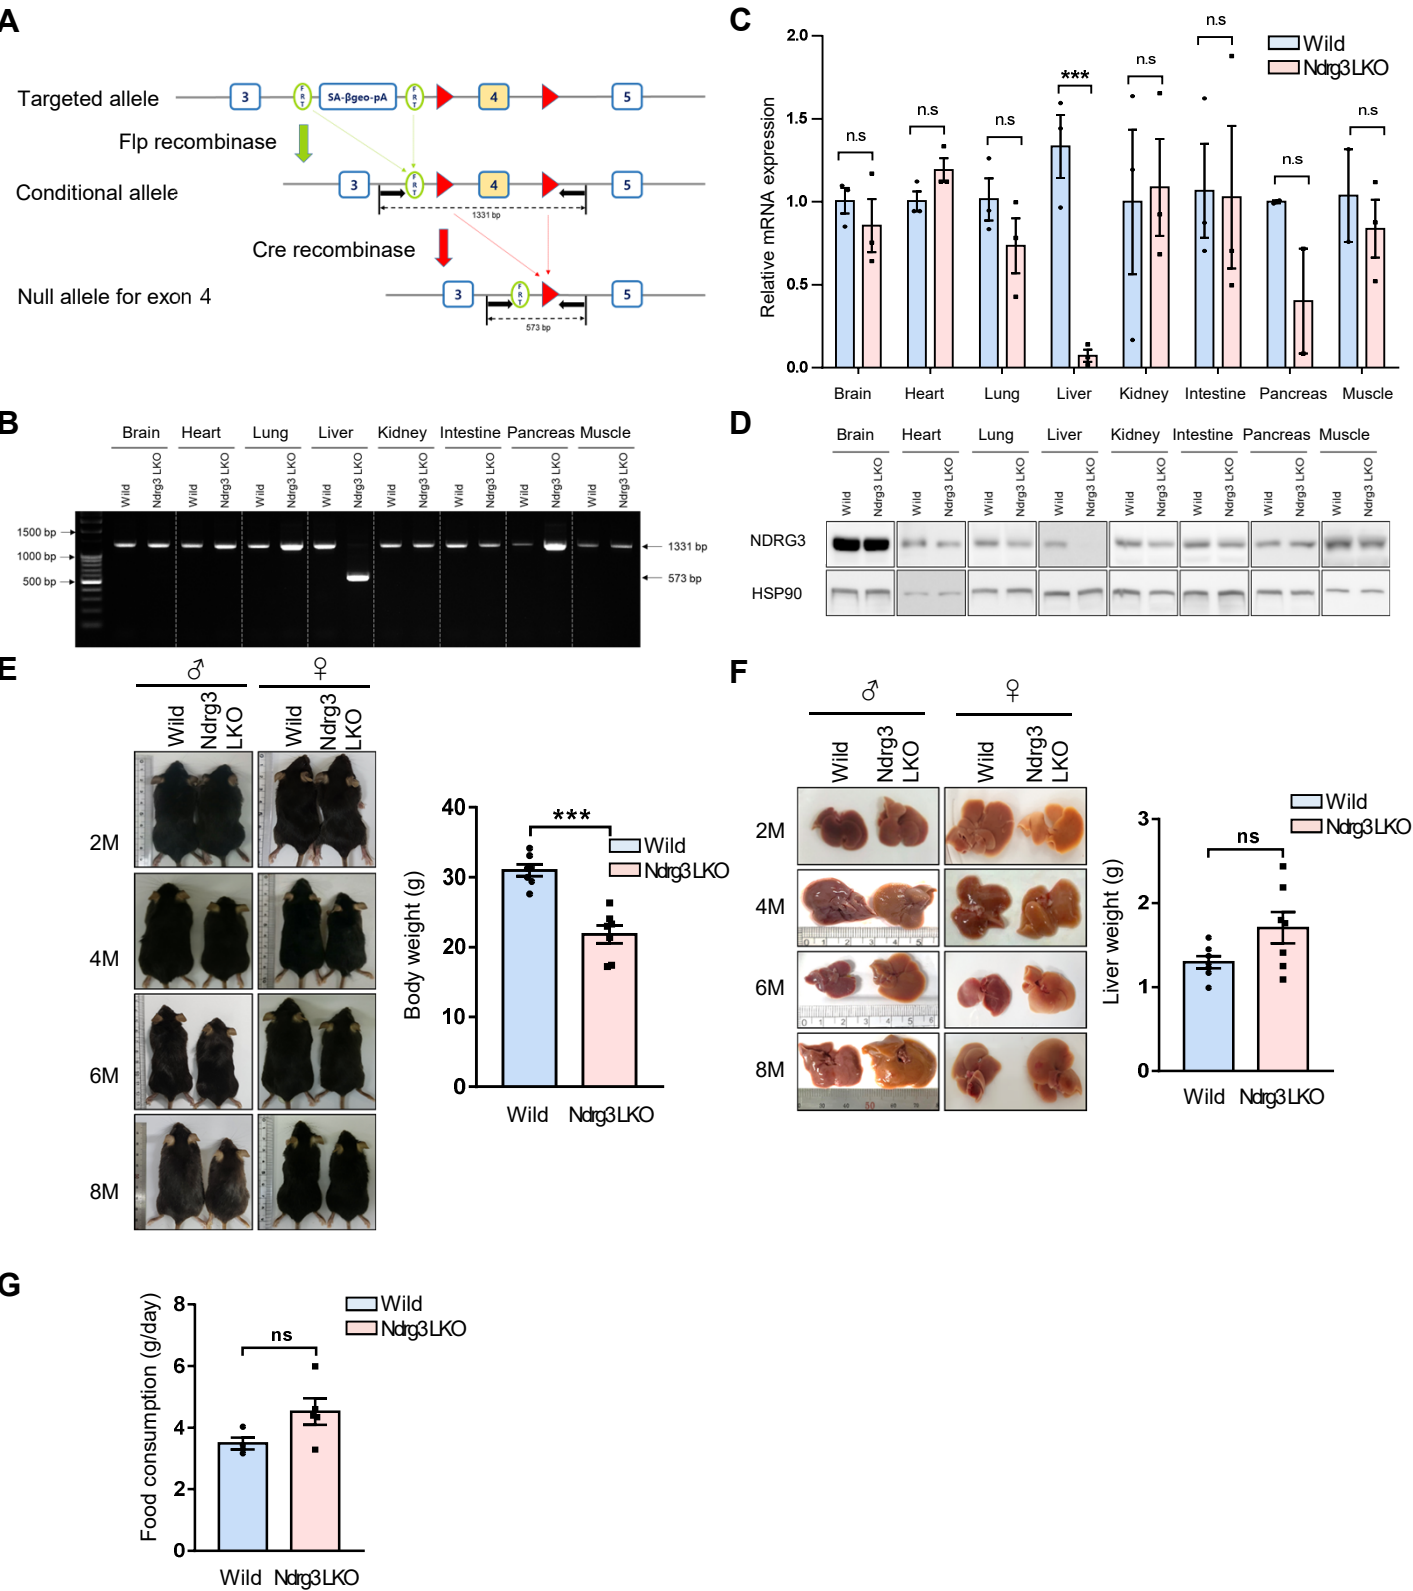

**Figure S1. Generation of liver-specific KO mouse for *Ndr3* gene and gross examination of pathologic phenotypes.** (A) Scheme for the generation of mice harboring liver-specific deletion allele of *Ndr3*. Exon 4 region of *Ndr3* gene flanked by loxP sites (red arrowheads) was excised by albumin-Cre recombination system. Black arrows indicate the primer target sites for genomic DNA amplification to verify genetic deletion. (B) Liver-specific deletion of *Ndr3* detected at the genomic DNA level via PCR analysis. Black arrows indicate the primer target size (wild length = 1331bp, *Ndr3* knockout length = 573bp). (C) Quantitative real-time RT-PCR (qRT-PCR) analysis to verify liver-specific deletion of *Ndr3* (n=2-3 per group). *Ndr3* expression was normalized using *Gapdh* as the reference. (D) Verification of liver-specific NDRG3 deficiency at the protein level by a western blot analysis. (E) Representative images for the gross appearance of wild-type and NDRG3-deficient mice at increasing ages. Both male and female mice are shown. (F) Representative gross images for liver tissues from wild-type and NDRG3-deficient mice. (G) Daily food consumption by wild-type (n= 4) and *Ndr3* LKO (n= 5) mice. Males at 10-12 weeks of age were fasted overnight, and food weights (g) before and after refeeding were differentially calculated. Data are presented as mean  $\pm$  SEM. *p*-values were calculated using two-tailed Student's *t*-test (C,E,F,G). \*\*\**p* < 0.001 vs wild mice.

**Figure S2**

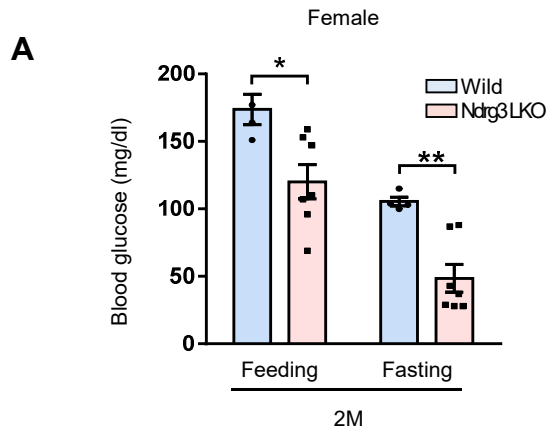

**Figure S2. Hypoglycemia in female mice with liver-specific NDRG3 abrogation.** (A) Blood glucose levels of 2-3-month-old, wild-type (n=4) and Ndr3 LKO (n=7) female mice determined *ad libitum* (Feeding) or after overnight fasting (Fasting). \*p < 0.05, \*\*p < 0.01.

**Figure S3**

**A**

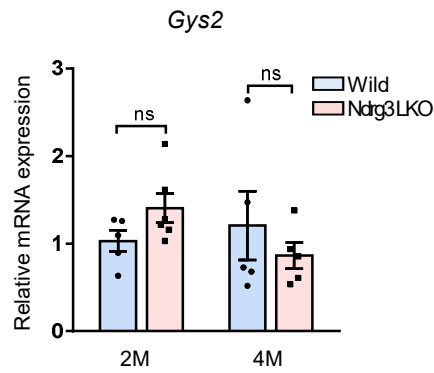

**B**

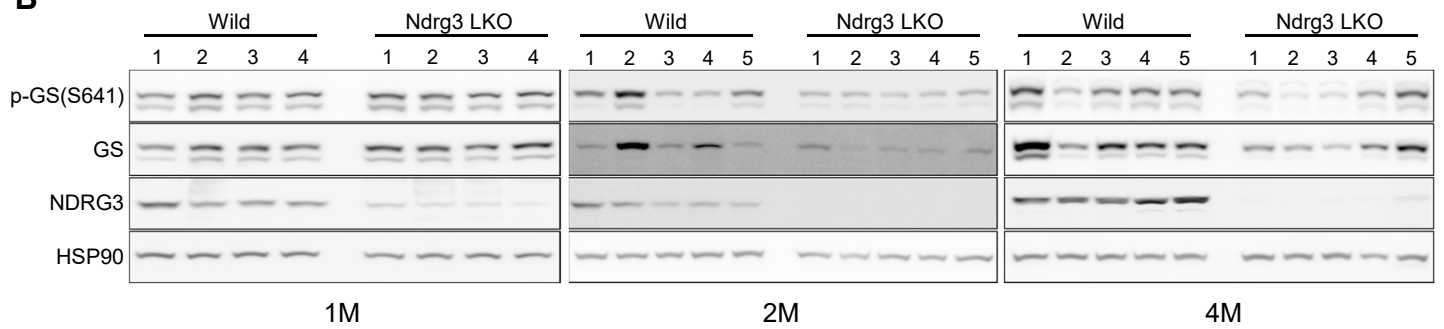

**Figure S3. Intact glycogen biosynthesis capacity in Ndr3 LKO mice.** (A) qRT-PCR analysis of *Gys2* gene expression in wild-type and Ndr3 LKO mouse livers at 2 or 4 months of age (n=5 per group). Mice were fasted overnight and then refed for 6 h before being subject to the gene expression analysis. Gene expression was normalized using *Gapdh* as the reference. (B) Western blot analysis for GS in wild-type and Ndr3 LKO mouse livers at increasing ages (n=4-5 per group).

**Figure S4**

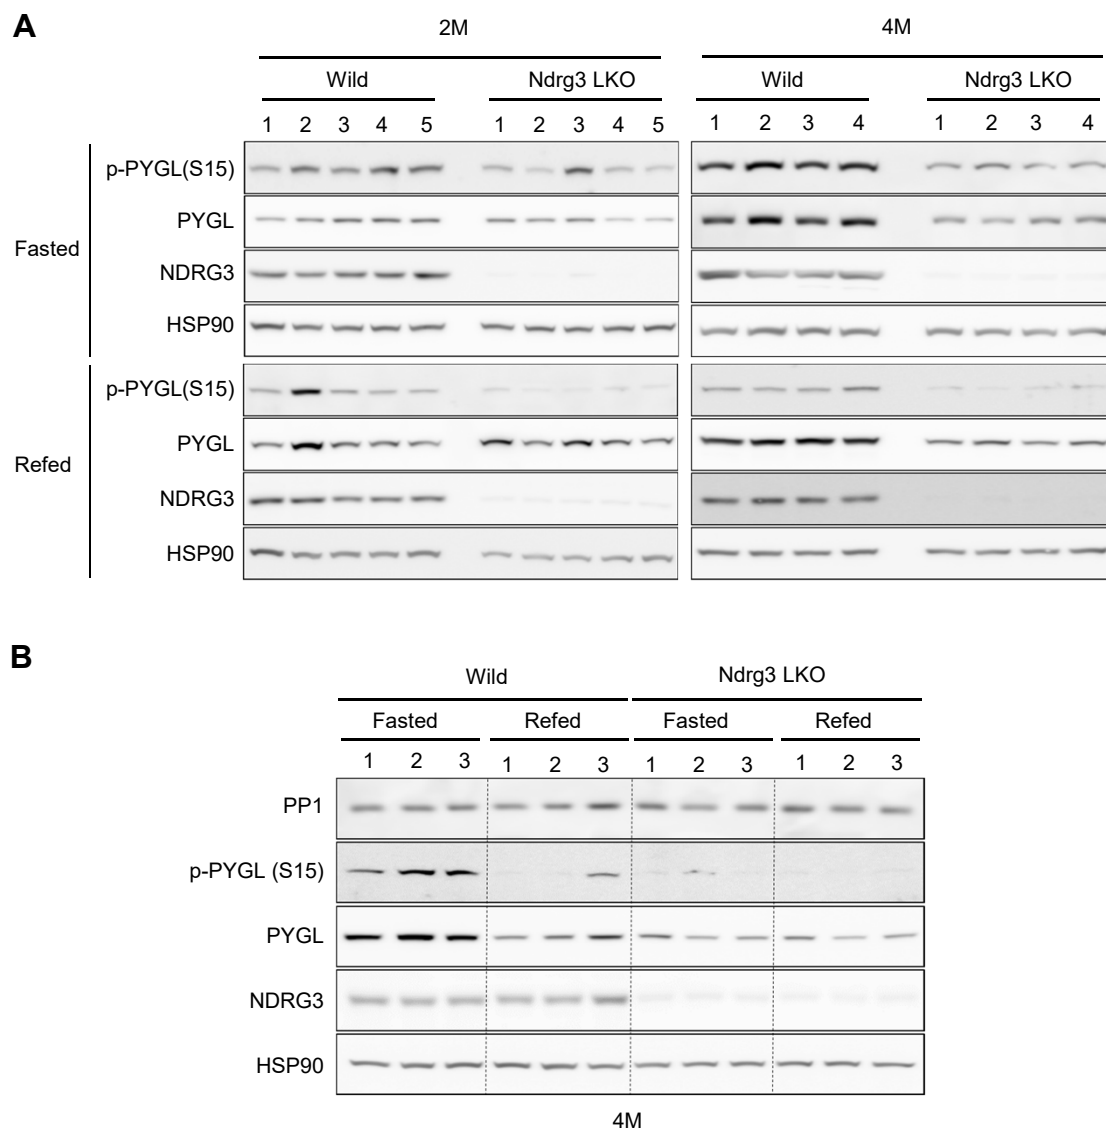

**Figure S4. Dysregulation of PYGL expression and activity in Ndr3 LKO livers.** (A) Western blot analysis of PYGL and p-PYGL(S15) expression in wild-type and Ndr3 LKO mouse livers at the age of 2 months (n=5 per group) or 4 months (n=4 per group). Mice were fasted for 15h or refed for additional 6h before being subject to the western blot analysis. (B) Western blot analysis of protein phosphatase 1 (PP1) expression in 4-month-old wild-type and Ndr3 LKO mice (n=3 per group). Expression of PYGL and p-PYGL(S15) is also shown as the control for possible PP1-mediated dephosphorylation activity.

**Figure S5**

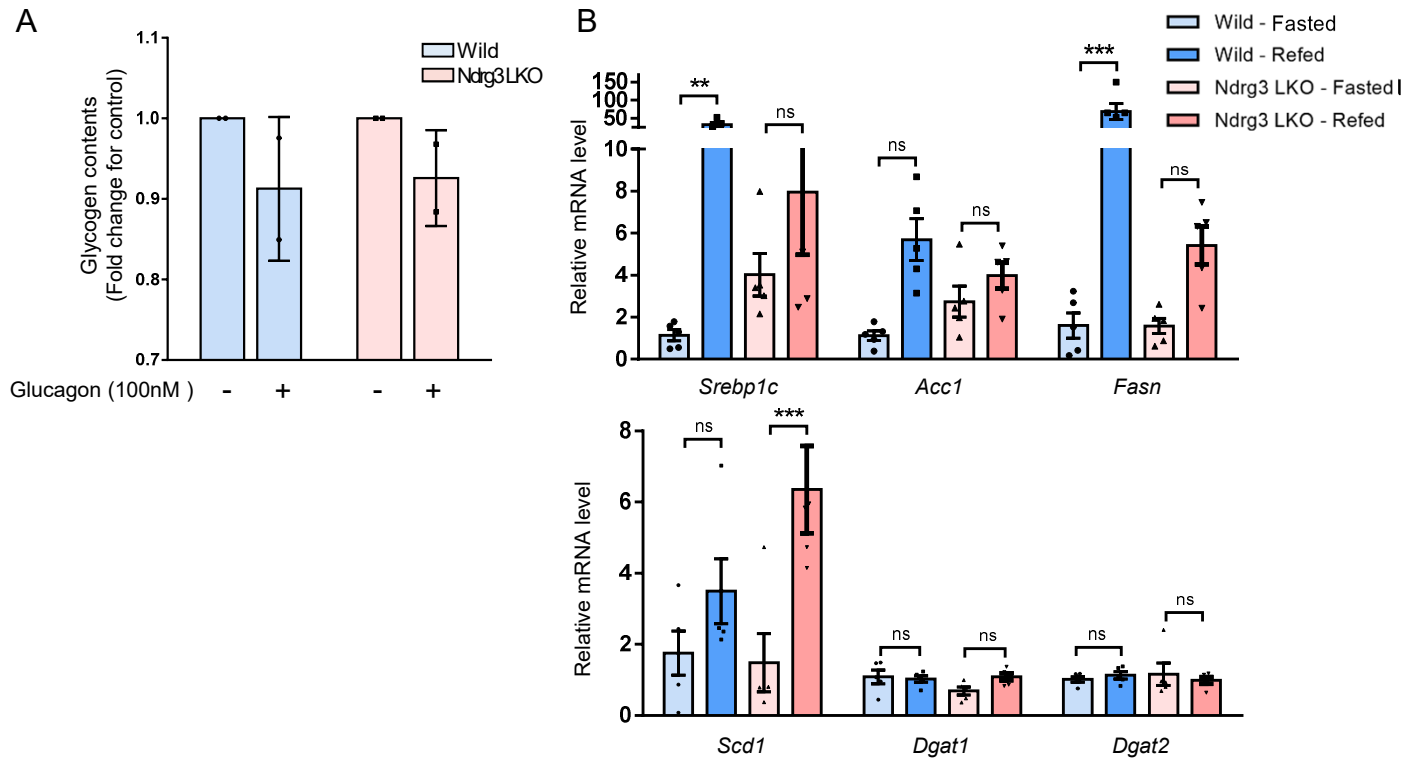

**Figure S5. Glycogenolytic and lipogenic activities in Ndr3 LKO mouse hepatocytes and livers.** (A) Glycogen content measured in primary hepatocytes after stimulation with 100nM glucagon for 1 h. Two independent experiments were performed in duplicates. Data are presented as mean  $\pm$  SD. (B) qRT-PCR analysis of lipogenic gene expression in wild-type and Ndr3 LKO mouse livers at 2 months of age (n=5 per group). Gene expression was normalized using *Gapdh* as the reference. Data are presented as mean  $\pm$  SEM. *p*-values were calculated using two-tailed Student's *t*-test (B). \*\**p* < 0.01 and \*\*\**p* < 0.001 vs wild mice.

Figure S6

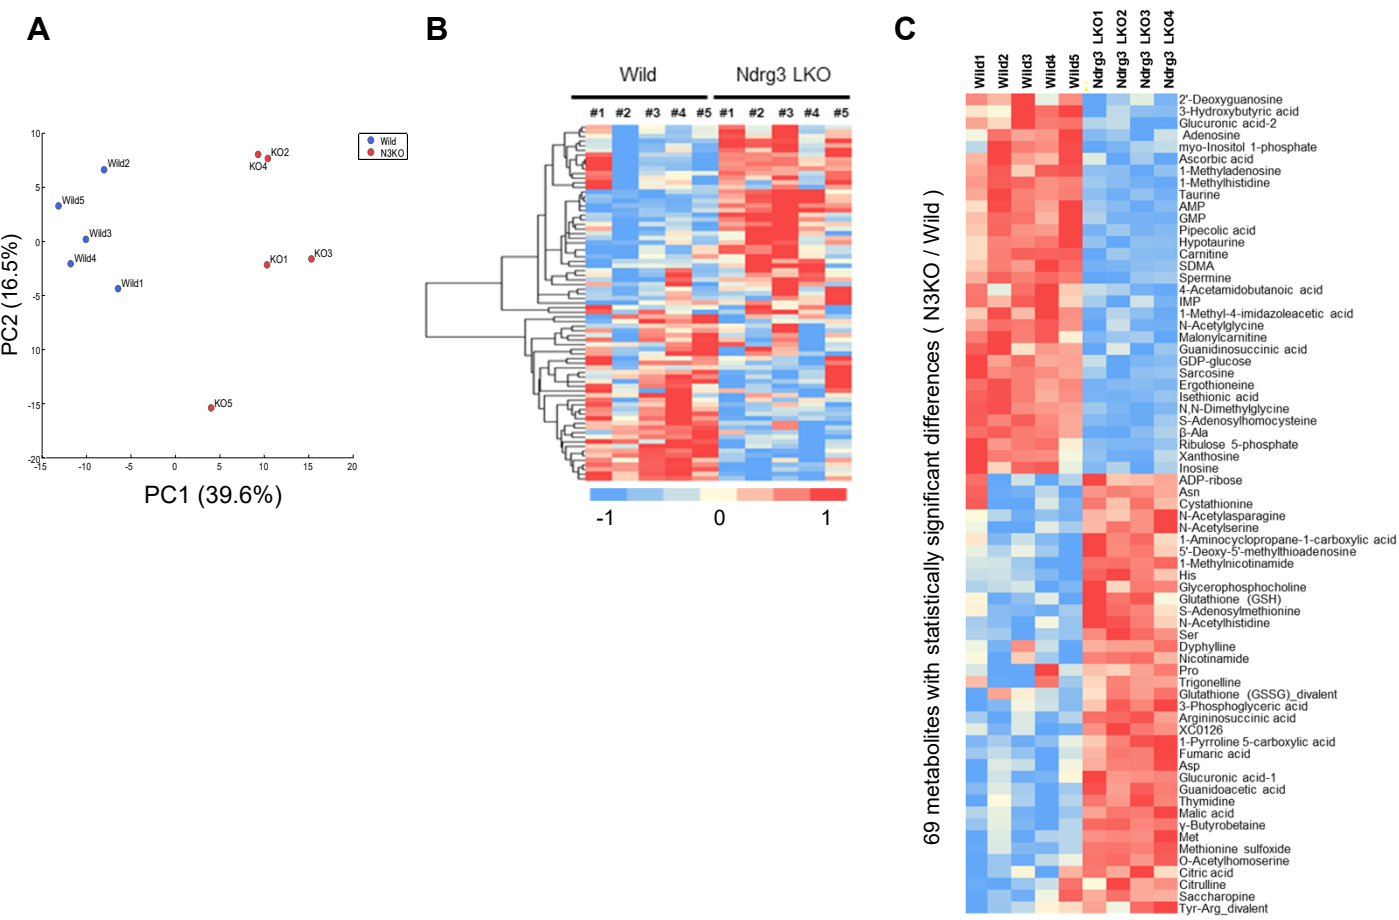

**Figure S6. Metabolomic alterations in methionine cycle and branch pathways in Ndr3 LKO livers.** (A) Principal component analysis (PCA) based on the normalized metabolomic data for the livers of wild-type (n=5, blue dots) and Ndr3 LKO mice (n=5, red dots). Percentage value of each axis in parentheses means the contribution rate for the first (PC1) and the second (PC2) principal components, and plot labels indicate sample name. Mice at 10-12 weeks of age were sacrificed under *ad libitum* states and used in the metabolome analysis. An outlier in Ndr3 LKO group (KO #5) was found to have developed severe ascites, and was excluded from subsequent analyses. (B) One-way hierarchical clustering analysis (HCA) of metabolite peaks extracted from the analysis of liver tissues of wild-type (n=5) and Ndr3 LKO (n=5) mice. Horizontal and vertical axes indicate sample labeling and metabolite peak, respectively. An outlier in Ndr3 LKO group (KO #5) was found to have developed severe ascites, and was excluded from subsequent analyses. (C) Heatmap for 68 metabolites satisfying  $(p < 0.05, \log_2(\text{fold change}) > 1)$  between wild-type (n=5) and Ndr3 LKO (n=4) mice. Red, relatively up-regulated. Blue, relatively down-regulated.

**Figure S7**

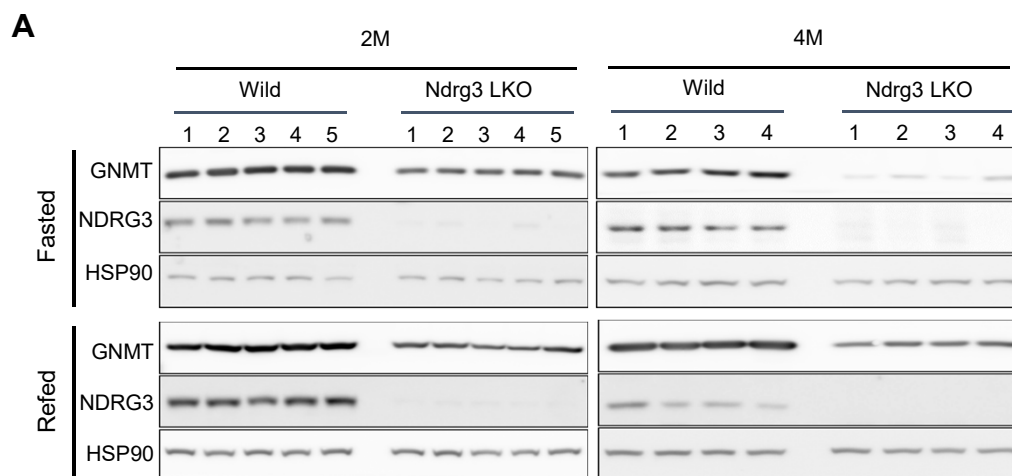

**Figure S7. Dysregulation of GNMT expression in NdrG3 LKO livers.** (A) Western blot analysis of GNMT expression in wild-type and NdrG3 LKO mouse livers at the age of 2 months (n=5 per group) or 4 months (n=4 per group). Mice were fasted for 15h or refed for additional 6h before being subject to the western blot analysis.



Table S1. List of primer sequences for quantitative real-time RT-PCR analysis and mouse genotyping.

| Target gene                                                 | Species     | Forward (5'→3')          | Reverse (5'→3')            |
|-------------------------------------------------------------|-------------|--------------------------|----------------------------|
| Primers for qRT-PCR                                         |             |                          |                            |
| <i>Ndr3</i> (exon4)                                         | M. Musculus | GCATGGTATGGTCCACGTCA     | CATCCATGGTGGGGTACTGG       |
| <i>Mat1a</i>                                                | M. musculus | CCTTCTCTGGAAAGGACTACACC  | GACAGAGGTTCTGCCACACCAA     |
| <i>Mtap</i>                                                 | M. musculus | CATTGCAGTGCCAGAGGAGTGT   | TGAATGGCACC GAAGTCCTAGC    |
| <i>Pemt</i>                                                 | M. musculus | ACTCATGCATGCTAGTCCCA     | AGCAGTGAAGGGCTCTTCAT       |
| <i>Bhmt</i>                                                 | M. musculus | GGAGGCTGCGCGGTTGAAA      | CTAGTGGCAACTCGGGGTTCC      |
| <i>Gnmt</i>                                                 | M. musculus | GCCAGACTGCAAAGGTGACCA    | GTCGTAATGTCCTTGGTCAGGTCA   |
| <i>Ahcy</i>                                                 | M. musculus | CAGCTTCTGT CAGGCATCCG    | AACTTGCTCTTGGTGACAGAATCG   |
| <i>Cbs</i>                                                  | M. musculus | CACAGTGCTGACCAAATCCCCC   | CACACTTGGCCAAGAGCTCAC      |
| <i>Pygl</i>                                                 | M. musculus | GGATTTTTGTGGACATTGAAAAA  | AACAAGGCCACAATTCTGTCTAA    |
| <i>Agl</i>                                                  | M. musculus | CCATTGCCTCTAAATTGACTTTG  | ACCTCAAGTTTTACAGAATGGA     |
| <i>Phka2</i>                                                | M. musculus | AGCCAAGATGAACTTGACCAGTA  | GGGAGTCAACAAGATTCAGTGAC    |
| <i>Gbe1</i>                                                 | M. musculus | TGAAGCCAATAAGACAATCACCT  | CCAGTCTCTGATGACCTCCATAC    |
| <i>G6pt</i>                                                 | M. musculus | TTGGAGTCATAGCCAATGAGAGT  | AAGCAAGAAGAAGACA ACTGTGC   |
| <i>Gaa</i>                                                  | M. musculus | GCCCTACCTGTACACTCTCTTCC  | AAGTAGCCCGTCACTTCAGTTTT    |
| <i>G6pc</i>                                                 | M. musculus | ACCGACTACTACAGCAACAGCTC  | ATGCGTTGGCTTTTTCTTTCTC     |
| <i>Gapdh</i>                                                | M. musculus | AGGTGCGGTGTGAACGGATTTG   | TGTAGACCATGTAGTTGAGGTCA    |
| <i>Pck1</i>                                                 | M. musculus | CTGGCACCTCAGTGAAGACA     | TCGATGCCTTCCCAGTAAAC       |
| <i>G6pc</i>                                                 | M. musculus | TCTGTCCCGGATCTACCTTG     | GTAGAATCCAAGCGCGAAAC       |
| <i>Fbp1</i>                                                 | M. musculus | CTGATATTCACCGCACTCTGG    | CGGCCTTCTCCATGACATAAG      |
| <i>Srebplc</i>                                              | M. musculus | GGAGCCATGGATTGCACATT     | CAGGAAGGCTTCCAGAGAGG       |
| <i>Acc1</i>                                                 | M. musculus | GCCTCTTCCTGACAAACGAG     | TGACTGCCGAAACATCTCTG       |
| <i>Fasn</i>                                                 | M. musculus | ACCTTAGAGGCAGTGCAGGA     | GGAGCGCAGGATAGACTCAC       |
| <i>Scd1</i>                                                 | M. musculus | CCGAAGAGGCAGGTGTAGAG     | CCAAGAGATCTCCAGTTCT        |
| <i>Dgat1</i>                                                | M. musculus | GGCCCAAGGTAGAAGAGGAC     | GATCAGCATCACCACACACC       |
| <i>Dgat2</i>                                                | M. musculus | AGGCCCTATTTGGCTACGTT     | CTTCAGGGTGACTGCGTTCT       |
| <i>Rpl32</i>                                                | M. musculus | GGCCTCTGGTGAAGCCCAAGATCG | CCTCTGGGTTTCCGCCAGTTTCGC   |
| Genotyping primers                                          |             |                          |                            |
| <i>Ndr3</i> KO                                              | M. musculus | GAGATGGCGCAACGCAATTAAT   | AGCTCAGTAGTACAGCACTTCCTTCG |
| Wild                                                        | M. musculus | GGAACCTCAGTTACAGATGGCTCT | CAGATTTATCTTTCACCCCTTAAGCA |
| Alb-Cre                                                     | M. musculus | GAAGCAGAAGCTTAGGAAGATGG  | TTGGCCCCCTTACCATAACTG      |
| Flp                                                         | M. musculus | GTGGATCGATCCTACCCCTTGCG  | GGTCCAAGTGCAGCCCAAGCTTCC   |
| Genotyping primers for tissue specificity of <i>Ndr3</i> KO |             |                          |                            |
| <i>Ndr3</i> LKO                                             | M. musculus | GATCTCTCAGTCTCAAACAC     | AGCTCAGTAGTACAGCACTTCCTTCG |

Table S2. Metabolite list for enriched metabolome sets satisfying ( $p < 0.05$ ,  $\log_2(\text{fold change}) > 1$ ) in the livers of Ndr3 LKO mice ( $n=4$ ) relative to wild type ( $n=5$ ).

| Up-regulated pathways and metabolites  |                              |            |                    |                                                                                                                                                                   |
|----------------------------------------|------------------------------|------------|--------------------|-------------------------------------------------------------------------------------------------------------------------------------------------------------------|
| Term                                   | $(-\log_{10}(p\text{-val}))$ | Hits/Total | Raw $p\text{-val}$ | Metabolites                                                                                                                                                       |
| Arginine and Proline Metabolism        | 4.58                         | 9/53       | 2.60E-05           | Argininosuccinic acid, Guanidoacetic acid, Fumaric acid, L-Proline, L-Aspartic acid, Citrulline, S-Adenosylhomocysteine, 1-Pyrroline-5-carboxylic acid, D-Proline |
| Aspartate Metabolism                   | 3.16                         | 6/35       | 0.0006             | Argininosuccinic acid, L-Asparagine, L-Aspartic acid, Citrulline, D-Aspartic acid, Fumaric acid                                                                   |
| Methionine Metabolism                  | 2.66                         | 6/43       | 0.0021             | L-Cystathionine, L-Serine, L-Methionine, 5'-Methylthioadenosine, S-Adenosylmethionine, Methionine sulfoxide                                                       |
| Glycine and Serine Metabolism          | 2.63                         | 7/59       | 0.0023             | L-Cystathionine, Guanidoacetic acid, L-Serine, L-Methionine, 3-Phosphoglyceric acid, S-Adenosylmethionine, D-Serine                                               |
| Methylhistidine Metabolism             | 2.21                         | 2/4        | 0.0061             | L-Histidine, S-Adenosylmethionine                                                                                                                                 |
| Urea Cycle                             | 1.87                         | 4/29       | 0.0134             | Argininosuccinic acid, Fumaric acid, L-Aspartic acid, Citrulline                                                                                                  |
| Ammonia Recycling                      | 1.72                         | 4/32       | 0.0188             | L-Asparagine, L-Histidine, L-Serine, L-Aspartic acid                                                                                                              |
| Spermidine and Spermine Biosynthesis   | 1.71                         | 3/18       | 0.0194             | L-Methionine, 5'-Methylthioadenosine, S-Adenosylmethionine                                                                                                        |
| Nicotinate and Nicotinamide Metabolism | 1.51                         | 4/37       | 0.0308             | 1-Methylnicotinamide, Adenosine diphosphate ribose, S-Adenosylmethionine, Niacinamide                                                                             |
| Homocysteine Degradation               | 1.47                         | 2/9        | 0.0333             | L-Cystathionine, L-Serine                                                                                                                                         |
| Down-regulated pathway and metabolites |                              |            |                    |                                                                                                                                                                   |
| Term                                   | $(-\log_{10}(p\text{-val}))$ | Hits/Total | Raw $p\text{-val}$ | Metabolites                                                                                                                                                       |
| Histidine Metabolism                   | 2.47                         | 7/43       | 0.0033             | 1-Methylhistidine, Adenosine monophosphate, Beta-Alanine, 3-Methylhistidine, S-Adenosylhomocysteine, Methylimidazole, Acetic acid                                 |
| Methylhistidine Metabolism             | 2.13                         | 2/4        | 0.0072             | 3-Methylhistidine, S-Adenosylhomocysteine                                                                                                                         |
| Methionine Metabolism                  | 1.78                         | 5/43       | 0.0165             | Adenosine monophosphate, Adenosine, Dimethylglycine, Sarcosine, S-Adenosylhomocysteine                                                                            |
| Betaine Metabolism                     | 1.43                         | 3/21       | 0.0369             | Adenosine, Dimethylglycine, S-Adenosylhomocysteine                                                                                                                |
| Carnitine Synthesis                    | 1.37                         | 3/22       | 0.0417             | Ascorbic acid, L-Carnitine, S-Adenosylhomocysteine                                                                                                                |
| Purine Metabolism                      | 1.35                         | 7/74       | 0.0446             | Adenosine monophosphate, Adenosine, Deoxyguanosine, Inosinic acid, Inosine, Xanthosine, Guanosine monophosphate                                                   |
